# Supplementary material for: Facile synthesis of CeO2decorated Ni(OH)2hierarchical composites for enhanced electrocatalytic sensing of H2O2
Source: Royal Society of Chemistry journal article supplement (doi:10.1039/c4ra17119e), 2015-01-01
Supplement: c4ra17119e1.pdf [file c4ra17119e1.pdf]

### Electronic Supplementary Information (ESI)

The SEM image of bare  $\text{Ni}(\text{OH})_2$  microstructure and the amperometric response of the electrodes modified with bare  $\text{Ni}(\text{OH})_2$  and  $\text{CeO}_2\text{-Ni}(\text{OH})_2$  composites with different  $\text{CeO}_2$  contents.

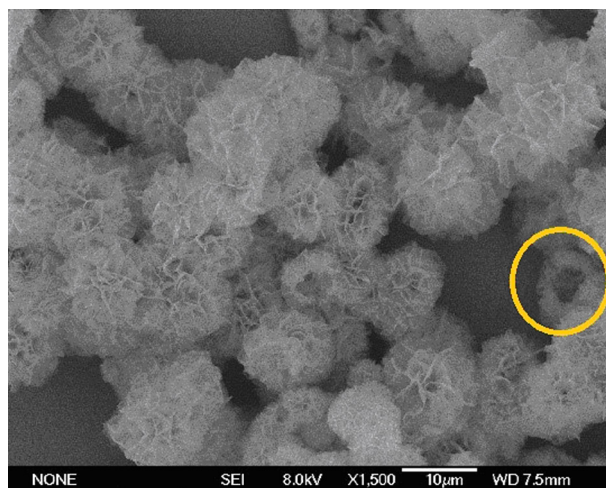

Fig. S1. SEM image of the bare  $\text{Ni}(\text{OH})_2$  sample prepared in the same condition.

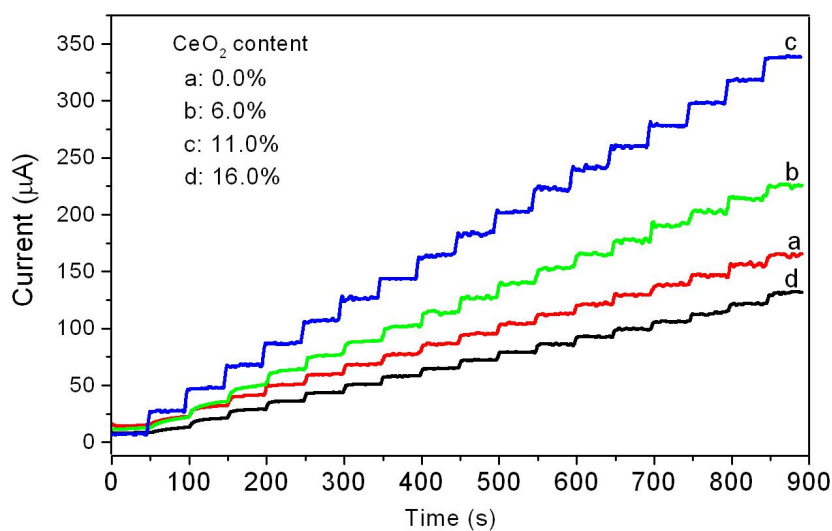

Fig. S2. Amperometric response of the electrodes modified with (a) bare  $\text{Ni}(\text{OH})_2$  and (b-d)  $\text{CeO}_2\text{-Ni}(\text{OH})_2$  composites with different  $\text{CeO}_2$  contents.
